1 **Langerhans cells immunocompetency is critical for IDO1-**  
2 **dependent ability to induce tolerogenic T cells.**  
3

4 **James Davies#<sup>1</sup>, Sofia Sirvent#<sup>1</sup>, Andres F. Vallejo<sup>1</sup>, Kalum**  
5 **Clayton<sup>1</sup>, Gemma Porter<sup>1</sup>, Patrick Stumpf<sup>2</sup>, Jonathan West<sup>3,4</sup>,**  
6 **Michael Ardern-Jones<sup>1</sup>, Harinder Singh<sup>5</sup>, Ben MacArthur<sup>3,4</sup>, Marta E**  
7 **Polak<sup>1,4</sup>**  
8  
9

- 10 1. Clinical and Experimental Sciences, Sir Henry Wellcome Laboratories, Faculty of  
11 Medicine, University of Southampton, SO16 6YD, Southampton, UK  
12 2. Human Development and Health, Faculty of Medicine, University of  
13 Southampton, Southampton SO17 1BJ, UK  
14 3. Cancer Sciences, Faculty of Medicine, University of Southampton, SO16 6YD,  
15 Southampton, UK  
16 4. Institute for Life Sciences, University of Southampton, SO17 1BJ, UK.  
17 5. Center for Systems Immunology, Departments of Immunology and Computational  
18 and Systems Biology, The University of Pittsburgh, Pittsburgh, PA 15213

19  
20 Correspondence to:  
21 Dr. Marta E Polak  
22 Systems Immunology Group  
23 Clinical and Experimental Sciences  
24 Faculty of Medicine  
25 University of Southampton,  
26 SO16 6YD, Southampton, UK  
27 e-mail: [m.e.polak@soton.ac.uk](mailto:m.e.polak@soton.ac.uk)  
28 phone: +44 (0) 20815727  
29  
30

31 **Abstract**

32

33 Human epidermal Langerhans cells (LCs) can coordinate both immunogenic and  
34 tolerogenic immune responses, creating an attractive opportunity for  
35 immunomodulation strategies. To investigate transcriptional determinants of human  
36 primary LC tolerance we applied single cells RNA-sequencing combined with  
37 transcriptional network modelling and functional analysis. Unsupervised clustering of  
38 single cell transcriptomes revealed that steady-state LCs exist in immature and  
39 immunocompetent states, and become fully immunocompetent on migration.  
40 Interestingly, LC migration, which has been shown to result in upregulation of the  
41 transcription factor IRF4, led in parallel to increased expression of a tolerogenic gene  
42 module including *IDO1*, *LGALS1*, *LAMTOR1* and *IL10RA*, which translated to  
43 efficient induction of regulatory T cells in co-culture assays by immunocompetent  
44 LCs. Using protein expression analysis and perturbation with inhibitors, we  
45 confirmed the role of IDO1 as a mediator of LC tolerogenic responses induced  
46 during LC migration. Computational analysis of regulons and Partial Information  
47 Decomposition analyses identified *IRF4* as a key driver for LC tolerogenic  
48 programmes. The predicted IRF4-regulated genes were confirmed by analysis of  
49 CRISPR-Cas9 edited LCs. These findings suggest that efficient priming of  
50 tolerogenic responses by LCs requires upregulation of a migration-coupled  
51 maturation program which is superimposed with a tolerance-inducing genomic  
52 module.

53 **Introduction**

54

55 Langerhans cells (LCs) reside in the epidermis as a dense network of immune  
56 system sentinels, capable of initiating potent immune responses to cutaneous  
57 pathogens and neoplastic cells<sup>1,2</sup>. As a first line of the cutaneous immune defence  
58 system, LCs are uniquely specialised at sensing the environment and extend  
59 dendrites through inter-cellular tight junctions to gain access to the outermost part of  
60 the skin, the stratum corneum, so that rapid responses can be initiated if a  
61 dangerous pathogen is encountered<sup>3</sup>. We and others have shown that LCs are  
62 highly capable of priming and augmenting CD4 T cell responses and can induce  
63 CD8 T cell activation via antigen cross presentation more effectively than CD11c+,  
64 CD141+, CD141- and CD14+ dermal DCs<sup>4,5,6</sup>. However, in the context of infection,  
65 LCs can be surprisingly inefficient; LCs fail to induce cytotoxic T cell in response to  
66 herpes simplex 1 virus and in the context of *Leishmania major* infection, ablation of  
67 LCs reduced the number of activated Treg cells and aided clearance of the disease,  
68 therefore questioning the role of LC in immunogenic responses to pathogenic  
69 stimuli<sup>7,8</sup>.

70 In contrast, during steady-state (non-dangerous) conditions, LCs selectively induce  
71 the activation and proliferation of skin-resident regulatory T cells<sup>9,10</sup> that prevent  
72 unwanted immune-mediated reactions. This key role of LCs in the maintenance of  
73 cutaneous and systemic homeostasis has been confirmed in many experimental  
74 systems. Using a mouse model for investigating LC tolerance, antigen processing  
75 and presentation of the keratinocyte protein desmoglein (Dsg3) resulted in efficient  
76 regulatory T cell (Treg) induction, whilst ablation of LCs led to increased  
77 autoimmunity<sup>11</sup>. LC migration from the epidermis is constantly observed during  
78 steady-state and transport of self-antigen derived from melanin to skin draining

79 lymph nodes results in no abnormal inflammatory disease, nor does the rate of  
80 transport change during induced inflammatory conditions<sup>12,13,14</sup>. In a mouse model of  
81 autoimmune encephalomyelitis, migratory skin LCs and not resident lymph DCs are  
82 required for the induction of Foxp3+ Tregs<sup>15</sup>. Epicutaneous delivery of OVA to OVA-  
83 sensitised mice and peanut protein to peanut-sensitised mice results in uptake and  
84 processing by skin DC and LC, but repeat exposure results in fewer inflammatory  
85 responses and an increase in Treg cells<sup>16,17</sup>. Similarly, LCs mediate murine  
86 tolerance during sensitisation by the hapten DNTB and is reliant on the presence of  
87 Tregs<sup>18</sup>.

88

89 While LC-induced tolerance appears to be key to cutaneous immune homeostasis,  
90 and understanding of molecular processes underpinning this can open opportunities  
91 for targeted vaccine and immunosuppressive therapeutics, currently little is known  
92 about what biological pathways LC use for directing tolerogenic T cell immune  
93 responses. Even though some comparisons can be drawn from analysis of other  
94 tolerogenic dendritic cell subsets, LC transcriptional programming is distinct from  
95 both dendritic cells and macrophages<sup>19,20,5,21</sup>. Thus, in-depth analysis of human  
96 primary LCs is necessary to expand understanding of their ability to induce  
97 tolerogenic responses. Here, we used single cell RNA-seq and *in vitro*  
98 experimentation to advance understanding of LC heterogeneity and immune  
99 activation at both the steady-state and after migration, revealing important insights  
100 into how LCs mediate tolerogenic T cell responses at the epidermis.

101

## 102 **Methods**

103 **Human LC and PBMC isolation:** Human blood and skin mastectomy and  
104 abdominoplasty samples were collected with written consent from donors with

105 approval by the South East Coast - Brighton & Sussex Research Ethics Committee  
106 in adherence to Helsinki Guidelines [ethical approvals: REC approval: 16/LO/0999).  
107 Fat and lower dermis was cut away and discarded before dispase (2 U/ml, Gibco,  
108 UK, 20h, +4°C) digestion. For steady-state LC extraction, epidermal sheets were  
109 digested in Liberase Tm (13 U/ml, Roche, UK, 2h, +37°C,) and enriched using  
110 density gradient centrifugation (Optiprep 1:4.2, Axis Shield, Norway). Migrated LCs  
111 were extracted from epidermal explant sheets cultured in media (RPMI, Gibco, UK,  
112 5%FBS, Invitrogen, UK, 100 IU/ml penicillin and 100 mg/ml streptomycin, Sigma,  
113 UK) for 48 hours, with or without dexamethasone (1 $\mu$ M, Hameln, UK).  
114 Dexamethasone stimulated migrated LC were washed with media prior to use in  
115 assays. Steady state and migrated LC were processed through fluorescence-  
116 activated cell sorting (FACS) and Drop-seq or cryopreserved in 90% FBS (Gibco,  
117 UK), 10% DMSO (Sigma, UK). PBMCs were extracted from human blood using  
118 lymphoprep (Stemcell, UK) density gradient separation. Naïve T cells were purified  
119 using the Naïve CD4+ T cell isolation kit (Miltenyi Biotec, UK). TRMs were extracted  
120 from epidermal sheets after 48 hour migration, followed by density gradient  
121 separation (Optiprep 1:3).

122

123 **Flow cytometry/ FACS:** Antibodies used for cell staining were pre-titrated and used  
124 at optimal concentrations. A FACS Aria flow cytometer (Becton Dickinson, USA) and  
125 FlowJo software was used for analysis. For FACS purification LCs were stained for  
126 CD207 (anti-CD207 PeVio700), CD1a (anti-CD1a VioBlue) and HLA-DR (anti-HLA-  
127 DR Viogreen, Miltenyi Biotech, UK). For T cell staining, antibodies anti-CD3 PerCP,  
128 anti-CD4 Viogreen, anti-CD127 Pe (Miltenyi Biotech, UK) and anti-CD25 PeCy7  
129 (Invitrogen, UK) were used for surface staining. Anti-FOXP3 FITC (eBiosciences,

130 UK), anti-IL-10 PE (Miltenyi, UK) and anti-IDO1 AlexaFluor647 (Biolegend, UK)  
131 antibodies were used for intranuclear and intracellular staining.

132

133 **Co-culture, suppression and inhibition assays:** For co-culture assays, purified LC  
134 and naïve CD4+ T cells or TRMs were co-cultured in human serum supplemented  
135 media (RPMI, Gibco, UK, 10% human serum, Sigma, UK, 100 IU/ml penicillin and  
136 100 mg/ml streptomycin, Sigma, UK) at a 1:50 ratio for 5-days at 37°C. For  
137 intranuclear FOXP3 staining T cells were permeabilised using the  
138 FOXP3/Transcription Factor Staining Buffer Set (eBiosciences, UK) following the  
139 manufacturers protocol, after cell surface marker staining. For IL-10 intracellular  
140 staining, T cells were stimulated with cell stimulation cocktail (eBioscience, UK) for 6  
141 hours and Golgi plug (eBioscience, UK) for 5 hours, prior to intracellular staining  
142 using Permeabilizing Solution 2 (BD Biosciences, UK). IDO1 intracellular staining of  
143 LCs was performed using Intracellular Fixation & Permeabilization Buffer Set  
144 (eBioscience, UK), following kit protocol. IDO1 inhibition experiments were  
145 performed using NLG-919 (10µM, Cambridge Bioscience UK) and epacadostat  
146 (EPAC, 1µM, Cambridge Bioscience UK) in media during migrated LC and naïve  
147 CD4+ T cell co-cultures. Proliferation assays were set up through combining FACS-  
148 purified CD3+CD4+CD127-CD25+ T cells induced after 5-day naïve CD4+ T cells  
149 and FACS-purified LC co-cultures, with autologous CFSE labelled PBMCs. PBMCs  
150 were labelled with CFSE using the CellTrace™ CFSE Cell Proliferation Kit  
151 (Invitrogen, UK), with ice cold PBS, 0.5% BSA replacing PBS and ice cold media  
152 replacing pre-warmed media as described in the protocol.

153

154 **Drop-seq:** After FACS purification, single LCs were co-encapsulated with primer  
155 coated barcoded Bead SeqB (Chemgenes, USA) within 1 nL droplets (Drop-seq<sup>22</sup>).  
156 Drop-seq microfluidic devices according to the design of Macosko *et al* were  
157 fabricated by soft lithography, oxygen plasma bonded to glass and functionalised  
158 with fluorinated silane (1% (v/v) trichloro(1H,1H,2H,2H-perfluorooctyl)silane in HFE-  
159 7500 carrier oil). Open instrumentation syringe pumps and microscopes (see  
160 dropletkitchen.github.io) were used to generate and observe droplets, using  
161 conditions and concentrations according to the Drop-seq protocol<sup>22</sup>, 700 steady-state  
162 LC and ~300 migrated LC from mastectomy skin were converted into ‘STAMPs’ for  
163 PCR library amplification (High Sensitivity DNA Assay, Agilent Bioanalyser) and  
164 tagmentation (Nextera XT, Illumina, UK). Sequencing of libraries was executed using  
165 NextSeq on a paired end run (1.5x10E5 reads for maximal coverage) at the Wessex  
166 Investigational Sciences Hub laboratory, University of Southampton.

167

168 **Transcriptomic data analysis:** The Drop-seq protocol from the McCarroll lab<sup>22</sup> was  
169 followed for converting sequencer output into gene expression data. The bcl2fastq  
170 tool from Illumina was used to demultiplex files, remove UMIs from reads and  
171 deduce captured transcript reads. Reads were then aligned to human hg19  
172 reference genome using STAR. Analyses of steady-state LCs alone was performed  
173 in an R environment using SCnorm normalisation<sup>23</sup>, universal manifold  
174 approximation and projection (UMAP) dimensionality reduction analysis (Scater<sup>24</sup>,  
175 singlecellTK<sup>25</sup>) and hierarchical clustering (clust=ward.D2, dist = canberra)<sup>26</sup>.  
176 Differentially expressed genes (DEGs) between cell clusters were identified using  
177 Limma<sup>27</sup> (FDR corrected p-value<0.05, logFC>1). Comparative analyses of steady-  
178 state and migrated was performed using the python-based Scanpy pipeline (version

179 1.5.0)<sup>28</sup>. High quality barcodes, discriminated from background RNA barcodes, were  
180 selected based on the overall UMI distribution using EmptyDrops<sup>29</sup>. Low quality  
181 cells, with a high fraction of counts from mitochondrial genes (20% or more)  
182 indicating stressed or dying cells were removed. In addition, genes with expression  
183 detected in <10 cells were excluded. Datasets were normalised using Scrn, using  
184 rpy2 within python<sup>30</sup>. Highly variable genes (top 2000) were selected using  
185 distribution criteria: min\_mean=0, max\_mean=4, min\_disp=0.1. A single-cell  
186 neighbourhood graph was computed on the first principal components that  
187 sufficiently explain the variation in the data using 10 nearest neighbours. Uniform  
188 Manifold Approximation and Projection (UMAP) was performed for dimensionality  
189 reduction. Leiden algorithm (Traag, Waltman and van Eck, 2019, PMID: 30914743)  
190 was used to identify clusters within cell populations (Leiden r = 0.5, n\_pcs=30).  
191 Differentially expressed genes (DEGs) between cell clusters were identified using T-  
192 test (FDR corrected p-value<0.01, logFC>1). Gene ontology analysis was performed  
193 using Toppgene (FDR corrected p-value<0.05), describing biological pathways  
194 associated with gene lists. Tolerogenic gene signature 1 (tol 1) was curated from  
195 published studies and literature exploring genes associated with DC or macrophage  
196 tolerogenic function. Single cell gene signature enrichment analyses of tol 1 was  
197 performed using Gene Set Variation Analysis (GSVA)<sup>31</sup>. Regulatory network  
198 inference analysis was performed using single-cell regulatory network inference and  
199 clustering (SCENIC) within python (Aibar et al., 2017). Public datasets from GEO  
200 used for analysis included a microarray dataset containing dexamethasone and  
201 vitamin D3 stimulated MoDC (ToIMoDC) with unstimulated MoDC (GSE52894) and a  
202 microarray dataset containing trypsinised steady-state LC with unstimulated MoDC  
203 (GSE23618) Normalised count matrices were downloaded from GEO before Limma



204 DEG analysis in R. DEGs upregulated in LCs and TolMoDCs compared to  
205 unstimulated MoDCs from each respective dataset were analysed, with unstimulated  
206 MoDC used as reference for comparison.

207

## 208 **Directional PIDC**

209 Notebooks from Chan et al were adapted for the analysis and run using Julia V 1.0.5  
210 in Jupyter Notebook. SCRAN-normalised data for migrated LCs including genes from  
211 the tol1 signatures and selected transcription factors was used for network inference  
212 using PIDC algorithm. Edge weights were exported, and sorted to include only  
213 transcription factors as targets. Hierarchical network was visualised using yED.

214

## 215 **Results**

216 **Steady state LCs exist in a spectrum of immune activation from immaturity to**  
217 **immunocompetency.**

218 LCs in steady-state healthy skin have been shown to expand skin resident memory  
219 Tregs which are important for mediating immune homeostasis and preventing  
220 unwarranted inflammatory responses<sup>9</sup>. However, when compared to dexamethasone  
221 and vitamin D3 stimulated model tolerogenic dendritic cells (TolMoDC), trypsinised  
222 steady-state LC display unique upregulated biological pathways with no crossover of  
223 differentially expressed genes (DEGs) when compared to unstimulated TolMoDC  
224 (FigureS1A, Figure S1B, Supplementary table 1). To explore the gene expression  
225 profiles underlying healthy LC tolerogenic function and to evaluate population  
226 heterogeneity *in situ* we performed single cell RNAseq on “steady-state LC”  
227 dissociated from healthy skin using the dispase/liberase protocol, as published  
228 previously<sup>32,33</sup>. UMAP dimensionality reduction analysis of 607 steady-state LCs

229 revealed heterogeneity was present amongst the population, with LCs transitioning  
230 from one state to another (Figure 1A). Using hierarchical clustering, steady-state LCs  
231 were grouped into two defined clusters (S1 and S2) which separated the population  
232 along the transitional route (Figure 1B). Gene expression comparison after grouping  
233 genes into intervals of increasing expression level, revealed S2 LCs to be more  
234 transcriptionally active than S1 (Figure 1C). Whilst the most highly expressed genes  
235 (>10 normalised expression) in both sub populations were associated with antigen  
236 processing and presentation, the number of genes and range of expression was  
237 highest at all expression intervals in S2 LCs. Differentially expressed gene (DEG)  
238 analysis identified 21 upregulated genes (*CD74*, *HLA-DRA*, *HLA-DRB1*, *B2M*) in S2  
239 LCs compared to S1 LCs, although no DEGs were identified in S1 compared to S2  
240 (Supplementary table 2). Whilst no specific gene ontologies were associated with  
241 tolerogenic pathways, analysis revealed associations with MHC II antigen  
242 presentation, T cell co-stimulation and response to cytokines (Figure 1D). Overall,  
243 steady-state LCs appear to exist in a spectrum of activation from lowly activated  
244 immature LC (S1) to more highly activated immunocompetent LC (S2), which likely  
245 influences their potential for coordinating T cell responses.

246

Figure 1

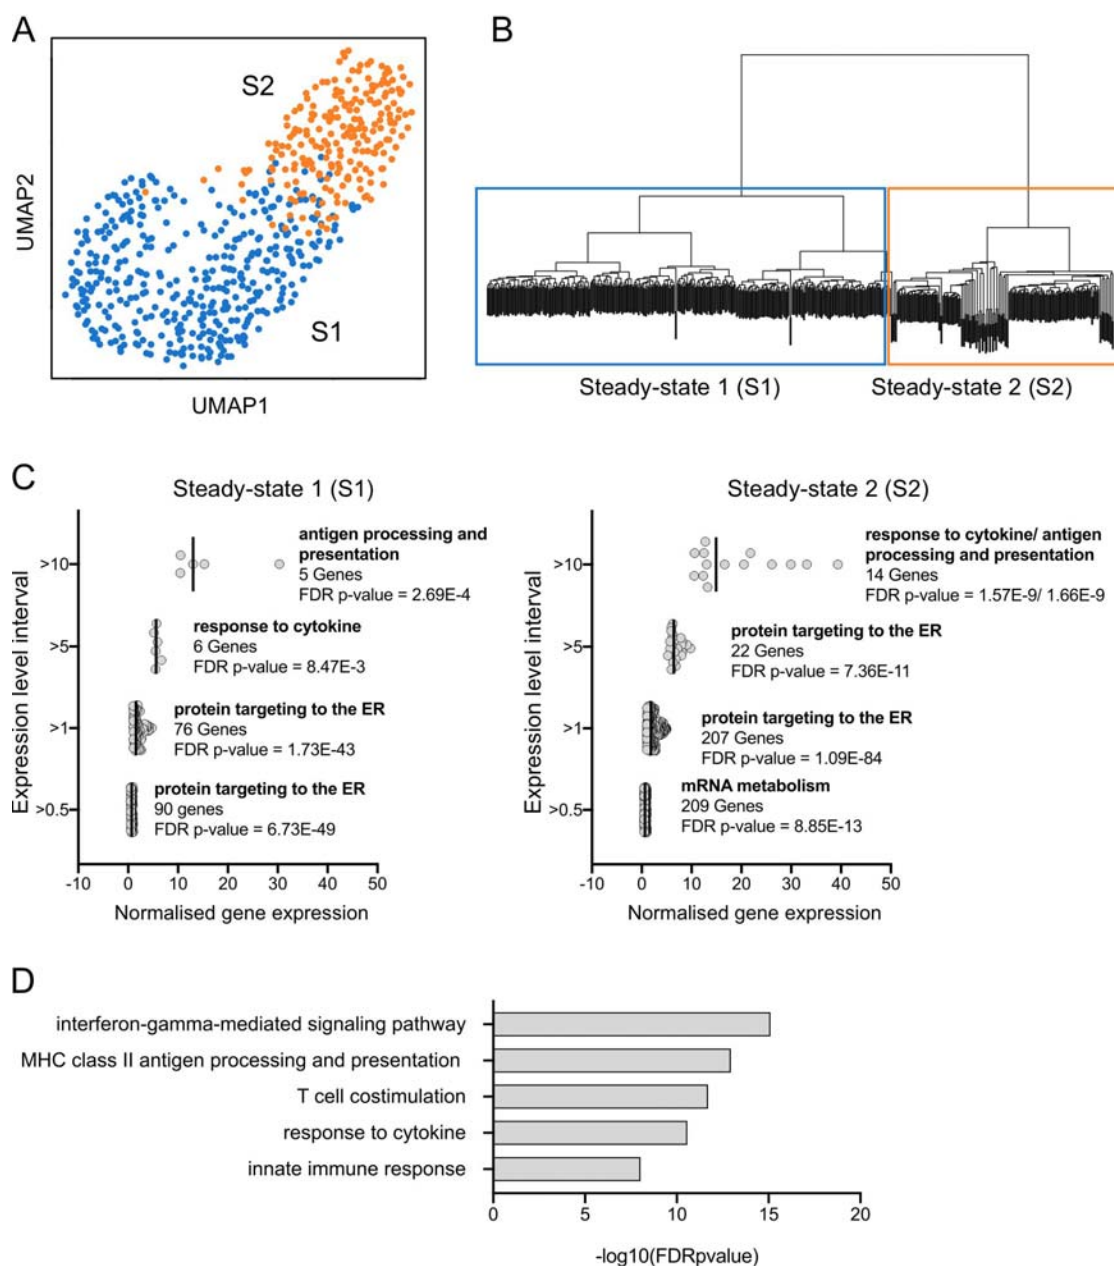

247

248 **Figure 1. Steady state LCs exist in a spectrum of immune activation from immaturity**  
 249 **to immunocompetency**

250 A. UMAP plot of 607 steady-state LCs (Scater, R) from 1769 genes following filtering  
 251 (mitochondrial genes <20%) and SCnorm normalisation.  
 252 B. Hierarchical clustering (clust=ward.D2, dist=canberra) of steady-state LCs defining the  
 253 division of the population into two sub clusters, steady-state 1 (S1) and steady-state 2  
 254 (S2).  
 255 C. S1 and S2 normalised gene expression values were grouped into expression level  
 256 intervals (y-axis). The number of genes included in each interval and the top associated  
 257 biological processes identified using ToppGene gene ontology analysis are displayed  
 258 with significance values (FDR corrected p-value).

259 D. Gene ontology analysis using ToppGene of 21 DEGs upregulated in S2 LC compared to  
260 S1 LC.  $-\log_{10}$  FDR corrected FDR corrected p-values are displayed.  
261

## 262 **Steady state immunocompetent LCs are superior at inducing FOXP3+ Treg**

263 As activation status defined LC subpopulations in the steady-state, the expression of  
264 classical DC activation markers and LC markers amongst the population was  
265 interrogated (Figure 2A, Figure S2A). Whilst *CD83* expression appeared  
266 homogenous, *CD40* was lowly detected in all steady-state LC. High HLA-DRA  
267 expression was detected in LCs from both clusters but *CD86* was predominantly  
268 expressed in S2 LC only. Following confirmation of the differential expression at the  
269 protein level using flow cytometry, CD86 was selected as a marker for distinguishing  
270 the two populations: immunocompetent and immature LCs (Figure 2B). To  
271 investigate the immune potential of these two steady-state LC populations,  
272 CD86High and CD86Low expressing LCs were isolated using FACS (Figure 2B) and  
273 co-cultured with CD4+ naïve T cells for 5-days after which the expansion of  
274 CD25+FOXP3+ Tregs was quantified (Figure 2C, Figure S2B). Surprisingly,  
275 CD86Low immature LCs did not increase the number of CD4+CD25+FOXP3+  
276 regulatory T cells compared to control. In contrast, CD86High immunocompetent LC  
277 significantly expanded the number of CD25+FOXP3+ Tregs compared to control  
278 ( $p=0.0143$ ) and CD86Low LC ( $p=0.0129$ ,  $n=3$  independent skin donors), revealing  
279 that the state of immunocompetence associates with LC ability to promote T cell-  
280 mediated immune tolerance.

Figure 2

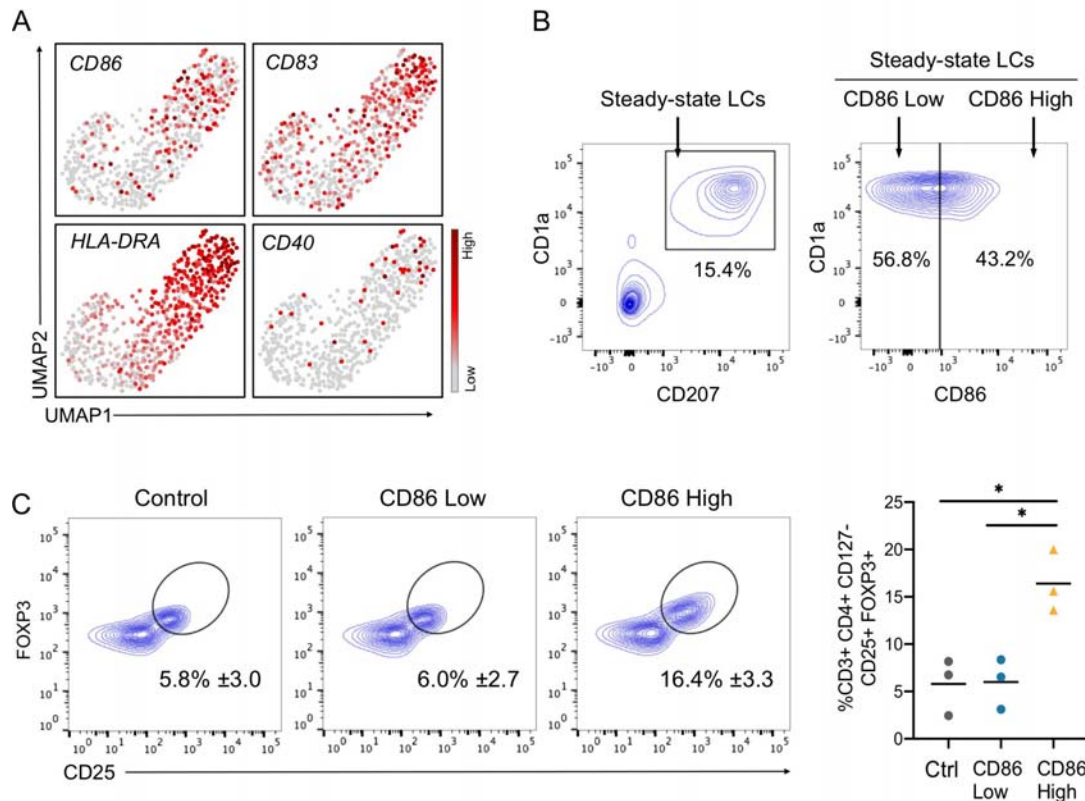

281

282 **Figure 2. Steady state immunocompetent LCs are superior at inducing FOXP3+ Tregs**

283 A. UMAP plots displaying markers: *CD86*, *CD83*, *HLA-DRA* and *CD40* expression  
284 amongst the steady-state LC population displaying low (grey) to high (dark red) SCnorm  
285 normalized expression.

286 B. Flow cytometry assessment of steady-state LCs identified as CD207/CD1a high cells.  
287 LC populations were separated into CD86Low and CD86High by FACS. Representative  
288 example from n=3 independent LC donors.

289 C. Flow cytometry assessment of CD4+ naive T cells after 5-day co-culture with either  
290 CD86Low or CD86High steady-state LC. 5-day cultures of CD4+ naive T cells alone  
291 were used as control. Tregs were identified as CD3+CD4+CD127-CD25+FOXP3+ cells.  
292 n=3 independent LC donor paired experiments. \*p<0.05.  
293

294 **Migration enhances tolerogenic abilities of immunocompetent LCs**

295 To explore further the link between LC activation status and tolerance induction, we  
296 sought to investigate the effect of *in vitro* migration from epidermal sheets on LCs  
297 tolerogenic characteristics and their molecular profile. We and others have  
298 previously shown that LCs, which have migrated out of the epidermis are more  
299 immune activated and primed to mediating T cell responses<sup>6,32,33</sup>. Therefore, we

300 sought to compare the capability of both steady-state LC and migrated LC to prime  
301 naïve CD4 T cells towards a tolerogenic phenotype. The expansion of  
302 CD25+FOXP3+ Tregs was measured after 5-day co-culture of naïve CD4+ T cells  
303 with LCs extracted at the steady-state via 2 hour enzymatic digestion or through  
304 migration from epidermal explants (Figure 3A). Steady-state and migrated LC both  
305 significantly amplified the percentage of CD25+FOXP3+ Tregs compared to CD4-  
306 only control (n=6 independent skin donors, steady-state LCs p=0.0101, migrated  
307 LCs p=<0.0001). However LCs ability to amplify Tregs was significantly augmented  
308 after migration, with increased percentages of CD25+FOXP3+ Tregs induced  
309 compared to steady-state LCs (Figure 3A, p=<0.0001). When co-cultured with  
310 antiCD3/CD28-stimulated PBMCs, Tregs expanded with migratory LCs potently  
311 inhibited activated CD4 and CD8 T cell proliferation (Figure 3B, C, respectively and  
312 Figure S3A, CD4 1:1 p=0.0088, CD4 1:3 p=0.0277, CD8 1:1 p=0.0007, CD8 1:3  
313 p=0.0111, n=5 from 3 independent LC donors). Similarly, migrated LCs efficiently  
314 expanded autologous epidermal tissue-resident memory T cells (TRMs) isolated  
315 from healthy epidermal tissue (Figure 3D, Figure S3B). Co-culture of migrated LCs  
316 with TRMs significantly increased the number of CD25+FOXP3+ Tregs compared to  
317 steady-state control (n=5 steady-state LC independent skin donors, n=4 migrated LC  
318 independent skin donors, p=0.0025). Furthermore, co-culture of migrated LCs with  
319 resident memory T cells also drove expansion of IL-10 producing CD4+ T cells,  
320 highlighting the tolerogenic capabilities of migrated LCs (Figure 3E, n=8 independent  
321 skin donors, p=0.0451).



Figure 3

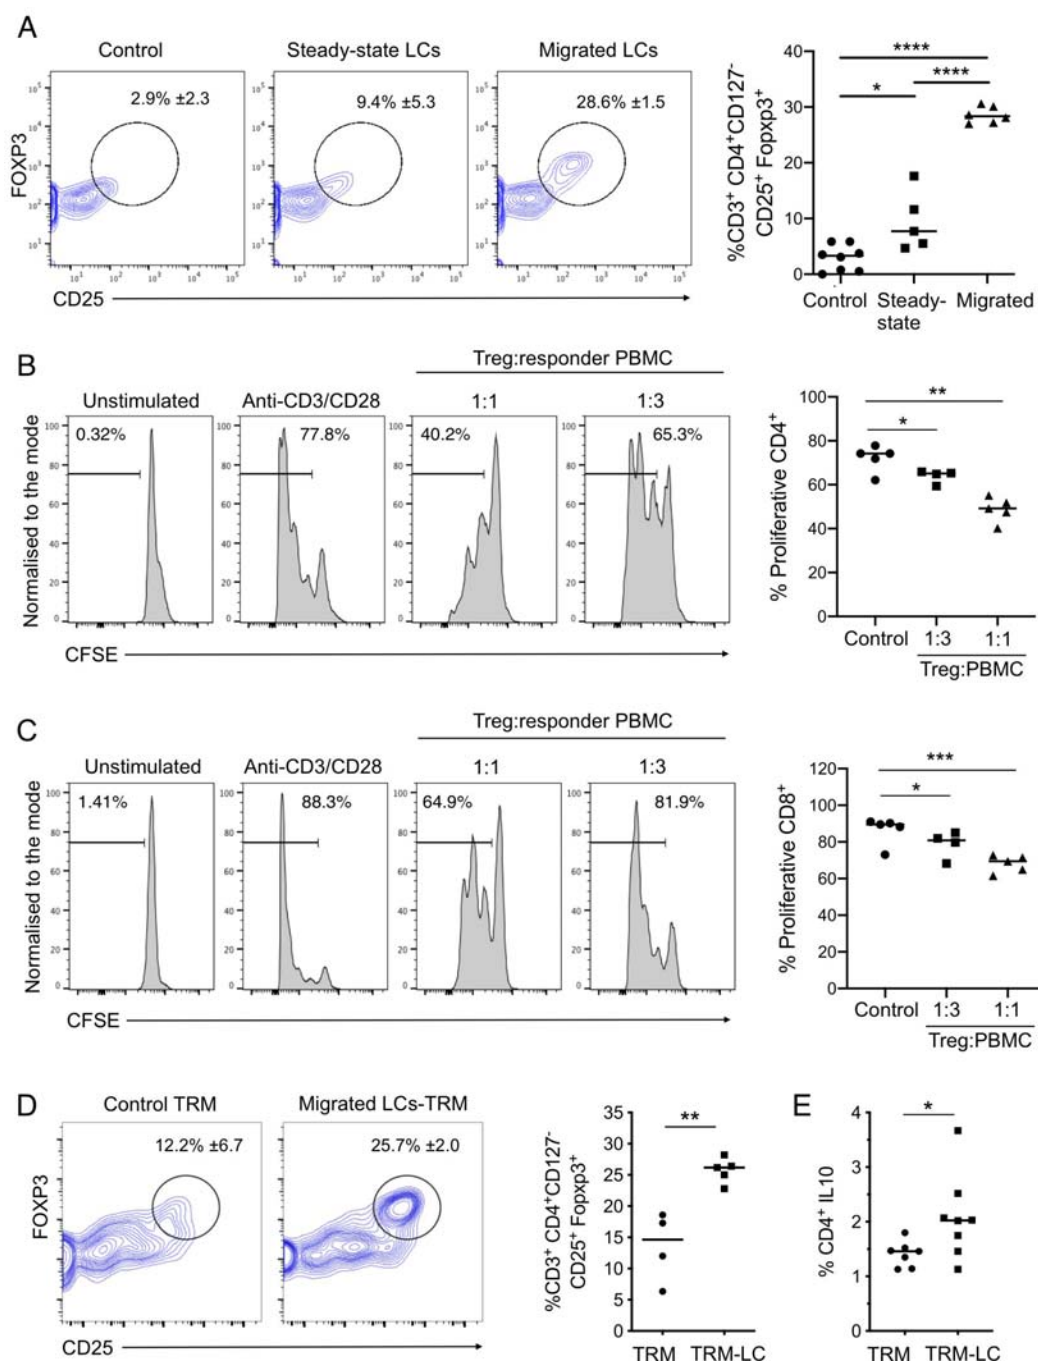

322

323 **Figure 3. Migration enhances tolerogenic abilities of immunocompetent LCs**

324 A. Flow cytometry assessment of the percentage of Tregs induced after 5-day co-culture of  
 325 steady-state LC and migrated LC with CD4+ naive T cells. 5-day cultures of CD4+ naive  
 326 T cells alone were used as control. Tregs were identified as CD3+CD4+CD127-  
 327 CD25+FOXP3+ cells. n=8 control, 5 steady-state and 6 migrated independent LC  
 328 donors. \*p<0.05, \*\*p<0.01, \*\*\*p<0.001.

329 B. CFSE labelled PBMCs gated on CD4+ T cells proliferation measurements after 3-day  
 330 co-culture with autologous purified CD3+CD4+CD127-CD25+ Tregs. The percentage of  
 331 proliferating CD4+ cells stimulated with plate bound anti-CD3 and soluble anti-CD28 is

- 332 displayed at ratios of 1:1 and 1:3 Treg:PBMC (n=5 from 3 independent LC donors).  
333 \*p<0.05, \*\*p<0.01.
- 334 C. CFSE labelled PBMCs, gated on CD8+ T cells, proliferation measurements after 3-day  
335 co-culture with autologous purified CD3+CD4+CD127-CD25+ Tregs. The percentage of  
336 proliferating CD8+ cells stimulated with plate bound anti-CD3 and soluble anti-CD28 is  
337 displayed at ratios of 1:1 and 1:3 Treg:PBMC (n=5 from 3 independent LC donors).  
338 \*p<0.05, \*\*\*p<0.001.
- 339 D. Flow cytometry assessment of the percentage of Tregs induced after 5-day co-culture of  
340 migrated LC with autologous T resident memory cells (TRMs) extracted from human  
341 epidermis. 5-day cultures of TRMs alone were used as control. Tregs were identified as  
342 CD3+CD4+CD127-CD25+FOXP3+ cells. n=5 independent LC donors. \*\*p<0.01.
- 343 E. Percentage of IL-10 producing CD4+ cells after co-culture of TRMs with or without  
344 migrated LC. n=8. \*p<0.05.

345

### 346 **Migration from the epidermis enhances LCs tolerogenic programming.**

347 The induction of tolerance by LC is believed to be critical for maintaining  
348 homeostasis at the skin<sup>9,20,34</sup>. To investigate transcriptional programmes encoding  
349 ability of LCs to induce immunotolerance, we first assembled a tolerogenic DC gene  
350 signature panel, based on literature review (tol 1, Supplementary Table 3). We  
351 confirmed that the signature was significantly enriched in LCs, either at the steady-  
352 state or migrated, with LCs expressing 30/64 genes of the tol1 signature (Figure  
353 4A,B, Supplementary Figure 4A,B). Surprisingly, the signature had significantly  
354 higher enrichment in migrated LCs (tol1= 1.26E-14), compared to steady state LCs,  
355 with 11/30 genes significantly upregulated in migrated LC (p<0.05, logFC>1, Figure  
356 4B,C , Supplementary Table 4).



Figure 4

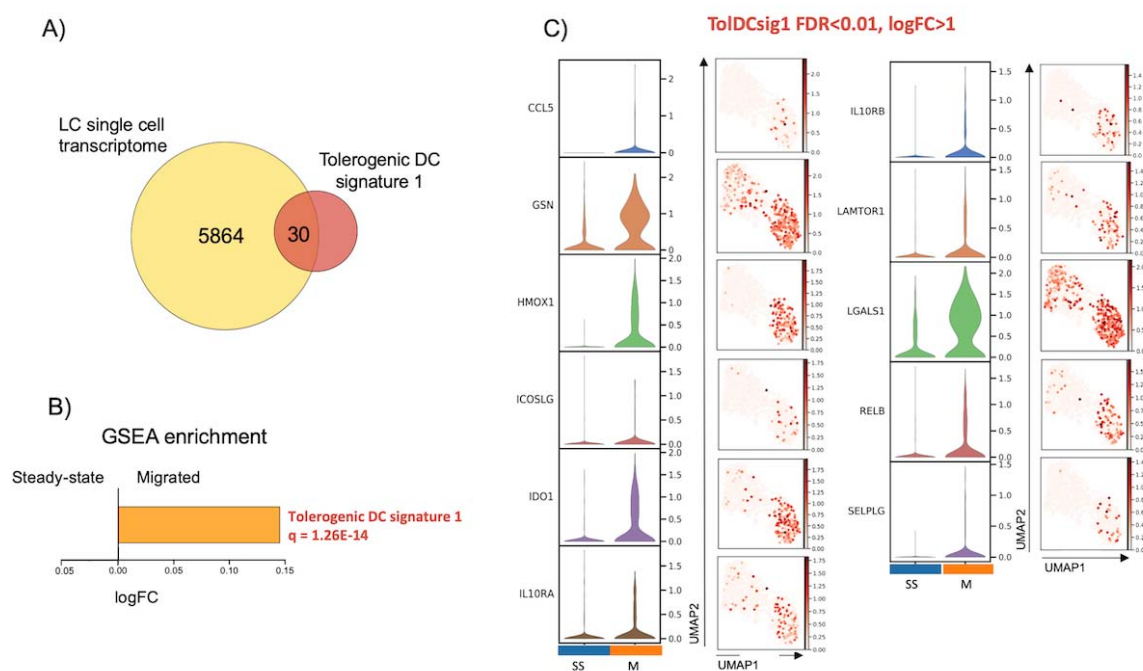

357

358 **Figure 4. Migration from the epidermis enhances LCs tolerogenic programming.**

359

360 A. Venn diagram displaying the number of genes from tolerogenic gene signature 1 (tol  
361 1), curated from literature exploring genes associated with DC or macrophage  
362 tolerogenic function, within the whole LC single cell dataset.

363 B. Gene Set Variation Analysis (GSVA) displaying enrichment of tol 1 in the LC  
364 populations. FDR corrected p-values and logFC are displayed.

365 C. Violin plots and UMAP marker plots displaying the expression of genes within tol 1  
366 amongst steady-state and migrated LCs (FDR corrected p-values <0.01, logFC>1).  
367

368 **LC-induced tolerance is mediated by IDO1 and can be enhanced by**

369 **immunotherapeutic intervention.**

370 Among all potential mediators of immunotolerance in immunocompetent LCs, *IDO1*

371 was the most extensively expressed in migrated LC, and homogenous in this

372 population. Consistent with the single cell RNA-seq data, the level of IDO1 protein

373 expression was considerably and significantly higher in migrated LCs compared to

374 steady-state LC (Figure 5A, Figure S5A, n=5 independent skin donors, p=0.0002),

375 indicating that this molecule can be critical to migrated LC tolerogenic function.

376 Blocking of IDO1 signalling with NLG-919, an immune checkpoint inhibitor,

377 significantly impaired LCs ability to expand tolerogenic T cells (Figure 5B,  
378  $p=0.0354$ ). Interestingly, interference with IDO1 using epacadostat (EPAC), another  
379 selective inhibitor of tryptophan catabolism was less potent (Figure 5B,  $p=0.0583$ ).  
380 LCs ability to prime and expand tolerogenic T cells creates an exciting opportunity  
381 for therapeutic interventions. Since steady-state LCs exist in a spectrum of  
382 immunocompetence, with a subpopulation of LCs already poised for tolerance  
383 induction, we hypothesised that *in situ* treatment can further potentiate their  
384 tolerogenic behaviour upon migration. To test this, we treated LCs with  
385 dexamethasone during migration from the epidermis. Indeed, dexamethasone  
386 migrated LCs were significantly more potent in expanding CD25+FOXP3+ Tregs  
387 (Figure 5C,  $n=4$  independent skin donors,  $p=0.0271$ ) in comparison to their untreated  
388 migrated counterparts. Additionally, CD4+ T cells expanded by migratory DexLCs  
389 ( $n=5$  independent skin donors,  $p=0.0061$ ) produced more IL10 than untreated  
390 migrated LC ( $p=0.028$ ), consistent with their tolerogenic phenotype (Figure 5D).  
391 Importantly, the presence of dexamethasone during LC migration further increased  
392 the expression of IDO1 protein and therefore enhanced the tolerogenic LC  
393 phenotype ( $n=4$  independent skin donors,  $p=0.0142$ ), supporting the importance of  
394 IDO1 for LC tolerogenic function (Figure 5A, Figure S5A).

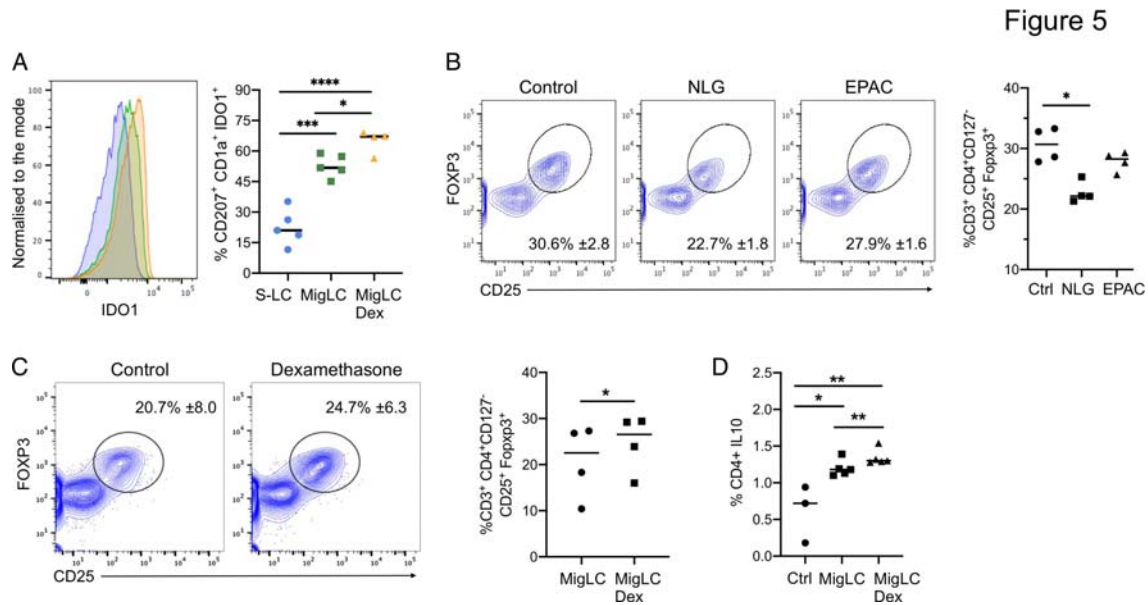

395

396 **Figure 5. LC-induced tolerance is mediated by IDO1 and can be enhanced by**  
 397 **immunotherapeutic intervention.**

- 398 A. Flow cytometry assessment of the percentage of IDO1 expression in steady-state LC  
 399 and migrated LC extracted by 48 hour culture of epidermal sheets with and without 1M  
 400 dexamethasone. n=5 steady-state and migrated independent LCs, n=4 migrated  
 401 dexamethasone independent LCs. \*p<0.05, \*\*\*p<0.001, \*\*\*\*p<0.0001.  
 402 B. Flow cytometry analysis of the percentage of Tregs induced after 5-day co-culture of  
 403 migrated LC with CD4<sup>+</sup> naïve T cells in the presence of IDO1 inhibitors NLG-919 (NLG)  
 404 and epacadostat (EPAC). 5-day cultures of CD4<sup>+</sup> naïve T cells alone were used as  
 405 control. Tregs were identified as CD3<sup>+</sup>CD4<sup>+</sup>CD127<sup>-</sup>CD25<sup>+</sup>FOXP3<sup>+</sup> cells. n=4  
 406 independent LC donors. \*p<0.05.  
 407 C. Flow cytometry assessment of the percentage of Tregs induced after 5-day co-culture of  
 408 migrated LC with and without dexamethasone stimulation, with CD4<sup>+</sup> naïve T cells.  
 409 Tregs were identified as CD3<sup>+</sup>CD4<sup>+</sup>CD127<sup>-</sup>CD25<sup>+</sup>FOXP3<sup>+</sup> cells. n=4 independent LC  
 410 donors. \*p<0.05.  
 411 D. Flow cytometry analysis of the percentage of CD4<sup>+</sup>IL10<sup>+</sup> T cells after 5-day co-culture  
 412 of migrated LC with and without dexamethasone stimulation, with CD4<sup>+</sup> naïve T cells. 5-  
 413 day cultures of CD4<sup>+</sup> naïve T cells alone were used as control. n=5 independent LC  
 414 donors. \*p<0.05, \*\*p<0.01.  
 415

416 **LC tolerogenic function depends on induction of IRF4-regulated**  
 417 **transcriptional programme.**

418 We next sought to identify the mechanisms regulating transcriptional programming of  
 419 immunotolerance in LCs. Single cell regulatory network inference analysis (SCENIC)  
 420 in steady state and migrated LCs from the same skin donor identified 16 regulons in  
 421 the steady state and 26 in migrated LCs (Aibar et al., 2017) (z-score enrichment  
 422 >0.4, Figure 6A). In agreement with the observed induction of immunocompetence,

423 regulons identified in migrated LCs were reported in immune cell activation (*JUND*,  
424 *STAT1*, *RELA*, *IRF4*, Figure 6A) . To identify transcription factors important for the  
425 immune tolerance programming in LCs, 5 transcription factors with the highest  
426 changes in gene expression level were selected for partial information  
427 decomposition analysis in context (Figure 6B PIDC,<sup>35</sup>). PIDC was designed and  
428 benchmarked for GRN inference from single cell RNA-seq data, and is an extended  
429 formalism using multivariate information measures for each triplet of gene in the  
430 context of every cell in the dataset. However, since the information flow in a GRN  
431 flows from transcription factors to target genes, which expression transcription  
432 factors regulate, we decided to restrict direction of the edges within the inferred  
433 network, including only interaction edges consistent with the information flow (TF ->  
434 target gene, directional PIDC). The resulting network comprised 70 edges with  
435 weight higher than 1, and when hierarchically organised, predicted distinct regulatory  
436 modules for genes in the *tol1* programme (Figure 6C, Supplementary Figure 6A-C).  
437 Interestingly, directional PIDC network analysis indicated combinatorial regulation of  
438 the majority of genes, with a single transcription factor implicated only for 3 targets. 6  
439 target genes and 1 transcription factor were predicted to be regulated by *IRF4*.  
440 Analysis of our existing data from LCs with *IRF4* expression edited by CRISPR-Cas9  
441 confirmed, that expression of 3 out of the predicted genes was indeed compromised  
442 in *IRF4* knock-down LCs (Figure 6D). Thus, LC migration from the epidermis results  
443 in a switching their transcriptional state resulting in the enhanced expression of a  
444 tolerogenic module that is dependent on *IRF4* regulation and underpins priming of  
445 Treg responses.

Figure 6

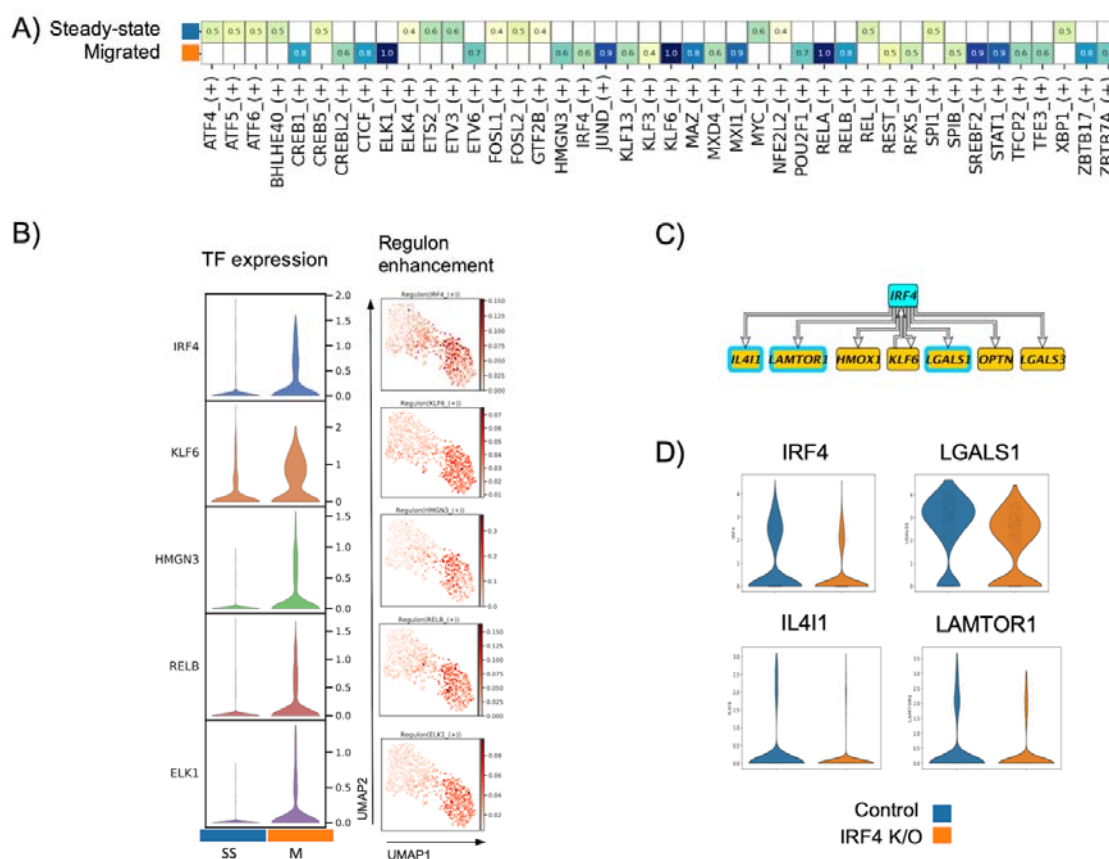

446

447

**Figure 6. LC tolerogenic function depends on induction of IRF4-regulated transcriptional module.**

448

449

450

451

452

453

454

455

456

457

458

459

460

461

462

463

464

- A. SCENIC regulatory network and inference clustering analysis revealed TF regulons which were enriched in steady-state and migrated LCs. Z-score heatmap of enriched regulons are displayed (z-score>0.4).
- B. Violin plots displaying the transcriptomic expression of TFs identified to be enriched in migrated LCs from SCENIC analysis. UMAP marker plots showing TF regulon enrichment Z-scores in each cell, across the two LC populations are displayed.
- C. Network displaying IRF4 with 6 target genes and 1 transcription factor as predicted by PIDC.
- D. 3 predicted IRF4 regulated genes (*IL4I1*, *LGALS1*, *LAMTOR1*) were identified to be downregulated in CRISPR-Cas9 IRF4 knock-down LCs.

## Discussion

While LC-mediated immunotolerance appears critical for cutaneous and systemic immune homeostatis, research into molecular mechanisms initiating and maintaining tolerogenic behaviour in human LCs has been significantly affected by the lack of

465 appropriate experimental models and limitations of available technologies. Here, we  
466 applied a microfluidic-based single cell and single bead co-encapsulation (Drop-seq,  
467 <sup>22</sup>) followed by high throughput sequencing of individual transcriptomes, to  
468 investigate transcriptional programmes in human LCs. This method allowed us to  
469 document heterogeneity in steady-state LC transcriptomes, displaying a spectrum of  
470 immune activation, previously, to the best of our knowledge, unobserved. Within this  
471 spectrum two subpopulations of steady-state LC could be identified: S1,  
472 characterised by low RNA content and immature state, and S2, which could be  
473 distinguished by high levels of CD86 expression at both mRNA and protein level,  
474 and displayed upregulated expression of antigen presenting genes, T cell co-  
475 stimulatory genes and genes generally associated with innate immune responses.  
476 Surprisingly, this latter population of LCs was characterised by ability to induce a  
477 tolerogenic T cell phenotype. Studies have previously shown that DCs in an  
478 immature and lowly activated state, expressing low levels of antigen presenting and  
479 co-stimulatory molecules, can drive tolerogenic responses by inducing anergy of  
480 antigen-specific T cells and expanding Tregs<sup>36,37</sup>. However, consistent with our  
481 findings, a study by Yamazaki et al. demonstrated that mature CD86High DCs were  
482 able to expand CD4+CD25+ T cells more effectively than CD86Low immature  
483 DCs<sup>38</sup>. Similarly, epicutaneous immunisation of mice increased migratory LC  
484 expression of CD80 and CD86 signature markers of activation, but did not result in  
485 efficient generation of effector memory CD4 T cells<sup>39</sup>. Our results indicate that while  
486 low expression levels of co-stimulatory molecules on immature DC reported by  
487 others may result in impaired generation of T cell activation, induction of tolerance  
488 requires delivering of efficient signal 2 through co-stimulation. Indeed, a study of  
489 transcriptional determinants of tolerogenic and immunogenic states in murine

490 dendritic cells, highlighted that the DC antigen presentation gene module is overlaid  
491 by an IRF4-dependent regulatory programme in a tolerance-induction setting<sup>40</sup>.  
492 Supporting the association between immunocompetence and ability to induce  
493 tolerance, LC migration out of the epidermis resulted in an even greater ability to  
494 induce Tregs than immunocompetent (S2) steady-state LCs. Analysis of single LC  
495 transcriptomes confirmed that migratory LCs are mature and characterised by  
496 upregulation of MHC II molecules, co-stimulatory molecules (CD80 and CD86) and  
497 chemokine receptors (CCR7), indicating readiness for migration to local lymph  
498 nodes, mediating interaction with T cells to promote adaptive immune  
499 responses<sup>41,42,43,19,32,33</sup>.

500 The increase in T cell co-stimulatory genes, such as CD86 and MHC class II genes  
501 in the immunocompetent S2 cluster, and in migrated LCs, suggest that physical  
502 interaction with T cells is necessary for LCs to coordinate Treg induction. Indeed,  
503 CD86 activity itself has been implicated in DC-mediated tolerance induction through  
504 interaction with CTLA4 receptors on T cells<sup>44,45</sup>. However, since LC ability to induce  
505 tolerogenic responses is greatly enhanced with immunocompetence status upon  
506 migration, it is likely to be governed by additional factors complementing immune  
507 activation, the capacity to process and present antigen and interact with T cells via  
508 co-stimulatory molecules. Consistent with this possibility, we observed the presence  
509 of a tolerogenic gene module of 30 genes, including *IDO1*, *LAMTOR1*, *IL4L1* and  
510 *LGALS1*, expressed by LCs. Galectin-1 encoded by the *LGALS1* gene has been  
511 shown to promote the generation of tolerogenic DCs and to enable Tr1 type Tregs to  
512 suppress Th1- and Th17-mediated inflammation<sup>46,46</sup>. Thus, Galectin-1 secreted by  
513 LCs could function in an autocrine as well as paracrine manner to promote Treg  
514 responses. The enzymes *IL4I1*, a mediator of H<sub>2</sub>O<sub>2</sub> production and *HMOX1*, which



515 degrades haem to carbon monoxide, have been shown to be expressed by DC and  
516 are implicated in the suppression of effector T cell activation and the induction of  
517 Tregs<sup>47-49</sup>. Additionally, *LAMTOR1* is implicated in macrophage polarization towards  
518 an immunoregulatory M2 phenotype<sup>50</sup>. Interestingly, PIDC analyses points to  
519 combinatorial regulation of the tolerogenic transcriptional programme in LCs. This is  
520 in concordance with the current understanding of gene transcription regulation, and  
521 highlights the importance of tolerance for LCs. While IRF4<sup>51,52</sup>, KLF6<sup>53</sup> RELB<sup>54,55</sup>,  
522 and ELK1<sup>56</sup> have been previously implicated in regulation of immunity or tolerance,  
523 *HMGN3* binds to nucleosomes and regulates chromatin organisation<sup>57</sup>. Implication of  
524 its function in LCs are certainly intriguing, and warrant further detailed investigations.  
525 Importantly, analyses of IRF4 CRISPR-Cas9 knock-down in LCs confirm the  
526 dependence of several tolerance-related genes, including *IL4L1* and *LGALS1* and  
527 *LAMTOR1* on IRF4. Interestingly, IRF4 did not seem to regulate expression of  
528 IDO1, a classical tolerogenic mediator, which catabolises tryptophan leading to  
529 skewing of T cell differentiation towards Tregs<sup>58</sup> directly. Identified as an interferon  
530 stimulated gene (ISG), IDO1 has been previously associated with DC activation by  
531 IFNs and TNF<sup>59,60</sup> and has been implicated in a number of regulatory feedback loops  
532 in cross-talk with other cell types – e.g. activation of CTLA4 receptors on T cells in  
533 turn induces IDO1 expression in DCs<sup>45</sup>. Two studies in human LCs previously  
534 demonstrated induction of IDO1 steady-state LCs, and its importance for inhibition of  
535 effector T cell proliferation on stimulation with IFN- $\gamma$ <sup>61</sup> and for Fc $\epsilon$ RI signalling<sup>62</sup>. Our  
536 study confirms and extends these findings, highlighting IDO1 as a key regulator of  
537 LC tolerogenic responses induced during LC migration. Consistently, steady-state  
538 LCs, which do not express high levels of IDO1, have limited ability to activate  
539 regulatory T cells, are perhaps sufficient to maintain tolerogenic memory T cells *in*



540 *situ*. In contrast, high levels of IDO1 induced by migration promote LC ability to prime  
541 naïve T cells for tolerance towards autoantigens. . Interestingly, recent study  
542 documents, that IRF4 can form multipartite transcriptional complex with AHR, a well  
543 established inducer of IDO1<sup>63,64</sup>, binding to promoter elements of tolerance  
544 associated genes<sup>65</sup>. High levels of IRF4 expression would thus potentially promote  
545 more efficient AHR action, and increase in IDO1 expression. Induction of *AHR*, *IRF4*  
546 and *IDO1* axis upon migration provides a mechanism for inducible IDO1 expression  
547 upon activation, and suggests the existence of a reinforcement loop for *in situ*  
548 tolerogenic responses through AHR-IRF4 signalling. This was previously observed in  
549 other DCs, where kynurenine metabolites, produced during IDO-mediated  
550 catabolism of tryptophan, feedback to AHRs to sustain IDO expression<sup>66,63</sup>.

551

552 Our extensive analysis of human primary steady-state and migrated LCs indicates  
553 that while LCs with tolerogenic ability exist *in situ*, migration greatly enhances LC  
554 tolerogenic potential. We postulate, that efficient priming of tolerogenic responses by  
555 LCs requires upregulation of a migration-coupled maturation program superimposed  
556 with a tolerance-inducing gene module. While the induction of this tolerogenic  
557 programme in LCs is complex, IRF4 is likely to act as a pivotal switch regulating LC  
558 immune function, and orchestrating complementary modules in LC transcriptional  
559 programming. The enhancement of LC tolerogenic abilities on maturation could be  
560 explored therapeutically to reinstate tolerance in the skin during inflammatory  
561 conditions.

562

### 563 **Acknowledgments:**

564 We are grateful to the subjects who participated in this study. We would like to thank  
565 Prof Peter Friedmann for in-depth review of the manuscript. We acknowledge the  
566 use of the IRIDIS High Performance Computing Facility and Flow Cytometry Core  
567 Facilities, together with support services at the University of Southampton. The study

568 was funded by a Sir Hendy Dale Fellowship from Wellcome Trust, 109377/Z/15/Z.  
569 Development of single cell Drop-Seq technology was funded by MRC grant  
570 MC\_PC\_15078.

571

572

573 **Authorship Contributions:**

574 MEP, SS and JD: intellectually conceived and wrote the manuscript, planned the  
575 experiments and analysed the results

576 SS, JD,KC,GP,AV: run functional experiments, flow cytometry, single-cell  
577 sequencing,

578 AV, JD, PS, JW: developed and optimised scRNA-sequencing

579 JD, BMA, AV, PS, MEP: analysis and meta-analysis of scRNA-seq data

580 MEP, MAJ, HS: discussions, data analysis, reviewing of the manuscript

581

582 **Conflict of Interest Disclosures:** Authors declare no conflict of interest

583

584 **References**

585

- 586 1. Mutyambizi, K., Berger, C. L. & Edelson, R. L. The balance between immunity and  
587 tolerance: the role of Langerhans cells. *Cellular and molecular life sciences*: CMLS **66**,  
588 831–40 (2009).
- 589 2. Deckers, J., Hammad, H. & Hoste, E. Langerhans Cells: Sensing the Environment in  
590 Health and Disease. *Frontiers in Immunology* **9**, 93 (2018).
- 591 3. Kubo, A., Nagao, K., Yokouchi, M., Sasaki, H. & Amagai, M. External antigen uptake by  
592 Langerhans cells with reorganization of epidermal tight junction barriers. *Journal of*  
593 *Experimental Medicine* **206**, 2937–2946 (2009).
- 594 4. Polak, M. E. *et al.* CD70-CD27 interaction augments CD8+ T-cell activation by human  
595 epidermal Langerhans cells. *The Journal of investigative dermatology* **132**, 1636–44  
596 (2012).
- 597 5. Artyomov, M. N. *et al.* Modular expression analysis reveals functional conservation  
598 between human Langerhans cells and mouse cross-priming dendritic cells. *The Journal*  
599 *of experimental medicine* **212**, 743–57 (2015).

- 600 6. Klechevsky, E. *et al.* Functional specializations of human epidermal Langerhans cells and  
601 CD14+ dermal dendritic cells. *Immunity* **29**, 497–510 (2008).
- 602 7. Allan, R. S. *et al.* Epidermal viral immunity induced by CD8alpha+ dendritic cells but not  
603 by Langerhans cells. *Science (New York, N.Y.)* **301**, 1925–8 (2003).
- 604 8. Ritter, U., Meißner, A., Scheidig, C. & Körner, H. CD8α- and Langerin-negative dendritic  
605 cells, but not Langerhans cells, act as principal antigen-presenting cells in leishmaniasis.  
606 *European Journal of Immunology* **34**, 1542–1550 (2004).
- 607 9. Seneschal, J. *et al.* Human Epidermal Langerhans Cells Maintain Immune Homeostasis in  
608 Skin by Activating Skin Resident Regulatory T Cells. *Immunity* **36**, 873–884 (2012).
- 609 10. van der Aar, A. M. G. *et al.* Langerhans Cells Favor Skin Flora Tolerance through Limited  
610 Presentation of Bacterial Antigens and Induction of Regulatory T Cells. *Journal of*  
611 *Investigative Dermatology* **133**, 1240–1249 (2013).
- 612 11. Kitashima, D. Y. *et al.* Langerhans Cells Prevent Autoimmunity via Expansion of  
613 Keratinocyte Antigen-Specific Regulatory T Cells. *EBioMedicine* **27**, 293–303 (2018).
- 614 12. Ghigo, C. *et al.* Multicolor fate mapping of Langerhans cell homeostasis. *The Journal of*  
615 *experimental medicine* **210**, 1657–64 (2013).
- 616 13. Hemmi, H. *et al.* Skin antigens in the steady state are trafficked to regional lymph nodes  
617 by transforming growth factor-β1-dependent cells. *International Immunology* **13**, 695–  
618 704 (2001).
- 619 14. Yoshino, M., Yamazaki, H., Shultz, L. D. & Hayashi, S.-I. Constant rate of steady-state self-  
620 antigen trafficking from skin to regional lymph nodes. *International Immunology* **18**,  
621 1541–1548 (2006).
- 622 15. Idoyaga, J. *et al.* Specialized role of migratory dendritic cells in peripheral tolerance  
623 induction. *The Journal of clinical investigation* **123**, 844–54 (2013).

- 624 16. Dioszeghy, V. *et al.* Epicutaneous Immunotherapy Results in Rapid Allergen Uptake by  
625 Dendritic Cells through Intact Skin and Downregulates the Allergen-Specific Response in  
626 Sensitized Mice. *The Journal of Immunology* **186**, 5629–5637 (2011).
- 627 17. Dioszeghy, V. *et al.* Differences in phenotype, homing properties and suppressive  
628 activities of regulatory T cells induced by epicutaneous, oral or sublingual  
629 immunotherapy in mice sensitized to peanut. *Cellular & Molecular Immunology* **14**, 770–  
630 782 (2017).
- 631 18. Gomez de Agüero, M. *et al.* Langerhans cells protect from allergic contact dermatitis in  
632 mice by tolerizing CD8(+) T cells and activating Foxp3(+) regulatory T cells. *The Journal of*  
633 *clinical investigation* **122**, 1700–11 (2012).
- 634 19. Polak, M. E. *et al.* Distinct Molecular Signature of Human Skin Langerhans Cells Denotes  
635 Critical Differences in Cutaneous Dendritic Cell Immune Regulation. *Journal of*  
636 *Investigative Dermatology* **134**, 695–703 (2014).
- 637 20. Clayton, K., Vallejo, A. F., Davies, J., Sirvent, S. & Polak, M. E. Langerhans Cells—  
638 Programmed by the Epidermis. *Frontiers in Immunology* **8**, 1676 (2017).
- 639 21. Duluc, D. *et al.* *Transcriptional fingerprints of antigen-presenting cell subsets in the*  
640 *human vaginal mucosa and skin reflect tissue-specific immune microenvironments.*  
641 (2014) doi:10.1186/s13073-014-0098-y.
- 642 22. Macosko, E. Z. *et al.* Highly Parallel Genome-wide Expression Profiling of Individual Cells  
643 Using Nanoliter Droplets. *Cell* **161**, 1202–1214 (2015).
- 644 23. Bacher, R. *et al.* SCnorm: robust normalization of single-cell RNA-seq data. *Nat Methods*  
645 **14**, 584–586 (2017).

- 646 24. McCarthy, D. J., Campbell, K. R., Lun, A. T. L. & Wills, Q. F. Scater: pre-processing, quality  
647 control, normalization and visualization of single-cell RNA-seq data in R. *Bioinformatics*  
648 **347**, btw777 (2017).
- 649 25. Jenkins, D., Faits, T., Khan, M., Carrasco Pro, S. & Johnson, W. singleCellTK: Interactive  
650 Analysis of Single Cell RNA-Seq Data. (2018).
- 651 26. Satija, R., Farrell, J. A., Gennert, D., Schier, A. F. & Regev, A. Spatial reconstruction of  
652 single-cell gene expression data. *Nature Biotechnology* **33**, 495–502 (2015).
- 653 27. Ritchie, M. E. *et al.* limma powers differential expression analyses for RNA-sequencing  
654 and microarray studies. *Nucleic Acids Research* **43**, e47–e47 (2015).
- 655 28. Wolf, F. A., Angerer, P. & Theis, F. J. SCANPY: Large-scale single-cell gene expression  
656 data analysis. *Genome Biology* **19**, 15 (2018).
- 657 29. Lun, A. T. L. *et al.* EmptyDrops: Distinguishing cells from empty droplets in droplet-based  
658 single-cell RNA sequencing data. *Genome Biology* **20**, 63 (2019).
- 659 30. Lun, A. T. L., Bach, K. & Marioni, J. C. Pooling across cells to normalize single-cell RNA  
660 sequencing data with many zero counts. *Genome Biology* **17**, 75 (2016).
- 661 31. Hänzelmann, S., Castelo, R. & Guinney, J. GSVA: gene set variation analysis for  
662 microarray and RNA-seq data. *BMC Bioinformatics* **14**, 7 (2013).
- 663 32. Polak, M. *et al.* Genomic programming of antigen cross-presentation in IRF4-expressing  
664 human Langerhans cells. *bioRxiv* (2019) doi:10.1101/541383.
- 665 33. Sirvent, S. *et al.* Genomic programming of IRF4-expressing human Langerhans cells.  
666 *Nature Communications Pre-print*, (2019).
- 667 34. Deckers, J., Hammad, H. & Hoste, E. Langerhans Cells: Sensing the Environment in  
668 Health and Disease. *Front Immunol* **9**, 93 (2018).

- 669 35. Chan, T. E., Stumpf, M. P. H. & Babbitt, A. C. Gene Regulatory Network Inference from  
670 Single-Cell Data Using Multivariate Information Measures. *Cell Syst* **5**, 251-267.e3  
671 (2017).
- 672 36. Mahnke, K., Schmitt, E., Bonifaz, L., Enk, A. H. & Jonuleit, H. Immature, but not inactive:  
673 the tolerogenic function of immature dendritic cells. *Immunology and Cell Biology* **80**,  
674 477–483 (2002).
- 675 37. Hasegawa, H. & Matsumoto, T. Mechanisms of Tolerance Induction by Dendritic Cells In  
676 Vivo. *Frontiers in immunology* **9**, 350 (2018).
- 677 38. Yamazaki, S. *et al.* Direct Expansion of Functional CD25<sup>+</sup> CD4<sup>+</sup> Regulatory T Cells by  
678 Antigen-processing Dendritic Cells. *The Journal of Experimental Medicine J. Exp. Med.* **198**,  
679 235–247 (2003).
- 680 39. Shklovskaya, E. *et al.* Langerhans cells are precommitted to immune tolerance induction.  
681 *Proceedings of the National Academy of Sciences of the United States of America* **108**,  
682 18049–54 (2011).
- 683 40. Vander Lugt, B. *et al.* Transcriptional determinants of tolerogenic and immunogenic  
684 states during dendritic cell maturation. *The Journal of cell biology* **216**, 779–792 (2017).
- 685 41. Shklovskaya, E., Roediger, B. & Fazekas de St Groth, B. Epidermal and dermal dendritic  
686 cells display differential activation and migratory behavior while sharing the ability to  
687 stimulate CD4<sup>+</sup> T cell proliferation in vivo. *Journal of immunology (Baltimore, Md.*  
688 *1950)* **181**, 418–30 (2008).
- 689 42. Villablanca, E. J. & Mora, J. R. A two-step model for Langerhans cell migration to skin-  
690 draining LN. *European Journal of Immunology* **38**, 2975–2980 (2008).

- 691 43. Cumberbatch, M., Dearman, R. J., Griffiths, C. E. M. & Kimber, I. Langerhans cell  
692 migration. *Experimental dermatology* . Review article. *Clinical and Experimental*  
693 *Dermatology* **25**, 413–418 (2000).
- 694 44. Mellor, A. L. *et al.* Specific subsets of murine dendritic cells acquire potent T cell  
695 regulatory functions following CTLA4-mediated induction of indoleamine 2,3  
696 dioxygenase. *International Immunology* **16**, 1391–1401 (2004).
- 697 45. Obregon, C., Kumar, R., Pascual, M. A., Vassalli, G. & Golshayan, D. Update on Dendritic  
698 Cell-Induced Immunological and Clinical Tolerance. *Frontiers in Immunology* **8**, 1514  
699 (2017).
- 700 46. Martinez Allo, V. C. *et al.* Suppression of age-related salivary gland autoimmunity by  
701 glycosylation-dependent galectin-1-driven immune inhibitory circuits. *Proc Natl Acad Sci*  
702 *U S A* (2020) doi:10.1073/pnas.1922778117.
- 703 47. Wong, T.-H., Chen, H.-A., Gau, R.-J., Yen, J.-H. & Suen, J.-L. Heme Oxygenase-1-  
704 Expressing Dendritic Cells Promote Foxp3<sup>+</sup> Regulatory T Cell Differentiation and Induce  
705 Less Severe Airway Inflammation in Murine Models. *PLoS One* **11**, e0168919 (2016).
- 706 48. Boulland, M.-L. *et al.* Human IL4I1 is a secreted L-phenylalanine oxidase expressed by  
707 mature dendritic cells that inhibits T-lymphocyte proliferation. *Blood* **110**, 220–227  
708 (2007).
- 709 49. Lasoudris, F. *et al.* IL4I1: an inhibitor of the CD8<sup>+</sup> antitumor T-cell response in vivo. *Eur J*  
710 *Immunol* **41**, 1629–1638 (2011).
- 711 50. Kimura, T. *et al.* Polarization of M2 macrophages requires Lamtor1 that integrates  
712 cytokine and amino-acid signals. *Nat Commun* **7**, 13130 (2016).
- 713 51. Sirvent, S. *et al.* Genomic programming of IRF4-expressing human Langerhans cells. *Nat*  
714 *Commun* **11**, 313 (2020).

- 715 52. Vander Lugt, B. *et al.* Transcriptional determinants of tolerogenic and immunogenic  
716 states during dendritic cell maturation. *J Cell Biol* **216**, 779–792 (2017).
- 717 53. Date, D. *et al.* Kruppel-like transcription factor 6 regulates inflammatory macrophage  
718 polarization. *J Biol Chem* **289**, 10318–10329 (2014).
- 719 54. Azukizawa, H. *et al.* Steady state migratory RelB<sup>+</sup> langerin<sup>+</sup> dermal dendritic cells  
720 mediate peripheral induction of antigen-specific CD4<sup>+</sup> CD25<sup>+</sup> Foxp3<sup>+</sup> regulatory T cells.  
721 *Eur J Immunol* **41**, 1420–1434 (2011).
- 722 55. Clark, G. J., Gunningham, S., Troy, A., Vuckovic, S. & Hart, D. N. Expression of the RelB  
723 transcription factor correlates with the activation of human dendritic cells. *Immunology*  
724 **98**, 189–196 (1999).
- 725 56. Maurice, D., Costello, P., Sargent, M. & Treisman, R. ERK Signaling Controls Innate-like  
726 CD8(+) T Cell Differentiation via the ELK4 (SAP-1) and ELK1 Transcription Factors. *J*  
727 *Immunol* **201**, 1681–1691 (2018).
- 728 57. West, K. L. *et al.* HMGN3a and HMGN3b, two protein isoforms with a tissue-specific  
729 expression pattern, expand the cellular repertoire of nucleosome-binding proteins. *J Biol*  
730 *Chem* **276**, 25959–25969 (2001).
- 731 58. Curti, A., Trabanelli, S., Salvestrini, V., Baccarani, M. & Lemoli, R. M. The role of  
732 indoleamine 2,3-dioxygenase in the induction of immune tolerance: focus on  
733 hematology. *Blood* **113**, 2394–2401 (2009).
- 734 59. Mellor, A. L., Lemos, H. & Huang, L. Indoleamine 2,3-Dioxygenase and Tolerance: Where  
735 Are We Now? *Frontiers in Immunology* **8**, 1360 (2017).
- 736 60. Braun, D., Longman, R. S. & Albert, M. L. A two-step induction of indoleamine 2,3  
737 dioxygenase (IDO) activity during dendritic-cell maturation. *Blood* **106**, 2375–2381  
738 (2005).



- 739 61. von Bubnoff, D. *et al.* Human Epidermal Langerhans Cells Express the Immunoregulatory  
740 Enzyme Indoleamine 2,3-Dioxygenase. *Journal of Investigative Dermatology* **123**, 298–  
741 304 (2004).
- 742 62. Koch, S. *et al.* AhR mediates an anti-inflammatory feedback mechanism in human  
743 Langerhans cells involving FcεRI and IDO. *Allergy* **72**, 1686–1693 (2017).
- 744 63. Nguyen, N. T. *et al.* Aryl hydrocarbon receptor negatively regulates dendritic cell  
745 immunogenicity via a kynurenine-dependent mechanism. *Proceedings of the National*  
746 *Academy of Sciences* **107**, 19961–19966 (2010).
- 747 64. Vogel, C. F. A., Goth, S. R., Dong, B., Pessah, I. N. & Matsumura, F. Aryl hydrocarbon  
748 receptor signaling mediates expression of indoleamine 2,3-dioxygenase. *Biochem*  
749 *Biophys Res Commun* **375**, 331–335 (2008).
- 750 65. Tousa, S. *et al.* Activin-A co-opts IRF4 and AhR signaling to induce human regulatory T  
751 cells that restrain asthmatic responses. *Proc Natl Acad Sci U S A* **114**, E2891–E2900  
752 (2017).
- 753 66. Li, Q., Harden, J. L., Anderson, C. D. & Egilmez, N. K. Tolerogenic Phenotype of IFN-γ-  
754 Induced IDO+ Dendritic Cells Is Maintained via an Autocrine IDO-Kynurenine/AhR-IDO  
755 Loop. *Journal of immunology (Baltimore, Md. 1950)* **197**, 962–70 (2016).

756  
757  
758  
759

760 **Supplementary Material**

761 **Langerhans cells immunocompetency is critical for IDO1-**  
762 **dependent ability to induce tolerogenic T cells.**

763

764 **James Davies<sup>#1</sup>, Sofia Sirvent<sup>#1</sup>, Andres F. Vallejo<sup>1</sup>, Kalum**  
765 **Clayton<sup>1</sup>, Gemma Porter<sup>1</sup>, Patrick Stumpf<sup>2</sup>, Jonathan West<sup>3,4</sup>,**  
766 **Michael Ardern-Jones<sup>1</sup>, Harinder Singh<sup>5</sup>, Ben MacArthur<sup>3,4</sup>, Marta E**  
767 **Polak<sup>1,4</sup>**

768

769

770 **Supplementary Table 1. Trypsinised steady-state LC and ToIMoDC DEGs**

771 DEGs comparing trypsinised steady-state LC to unstimulated MoDC (GSE23618) and  
772 ToIMoDC to unstimulated MoDC (GSE52894) were indentified using Limma (FDR  
773 corrected p-value<0.05, logFC>1). Biological pathways associated with DEGs were  
774 identified in Toppgene (FDR corrected p-value<0.05).

775

776 **Supplementary Table 2. Steady state LC DEG analysis**

777 DEGs comparing steady-state S1 and S2 LC using Limma (FDR corrected p-  
778 value<0.05, logFC>1). Biological pathways associated with DEGs were identified in  
779 Toppgene (FDR corrected p-value<0.05).

780

781 **Supplementary Table 4. Tolerogenic DC gene signature 1.**

782 Literature reviews and experimental papers referencing genes associated with DC  
783 and macrophage tolerogenic function were summarised into a 64 gene signature.

784

785 **Supplementary Table 3. Migrated and Steady state LC DEG analysis**

786 DEGs comparing migrated and steady-state LC using Limma (FDR corrected p-  
787 value<0.05, logFC>1). Biological pathways associated with DEGs were identified in  
788 Toppgene (FDR corrected p-value<0.05).

789

790

791

792

793

794

795 **Supplementary Figures**  
796

Supplementary Figure 1

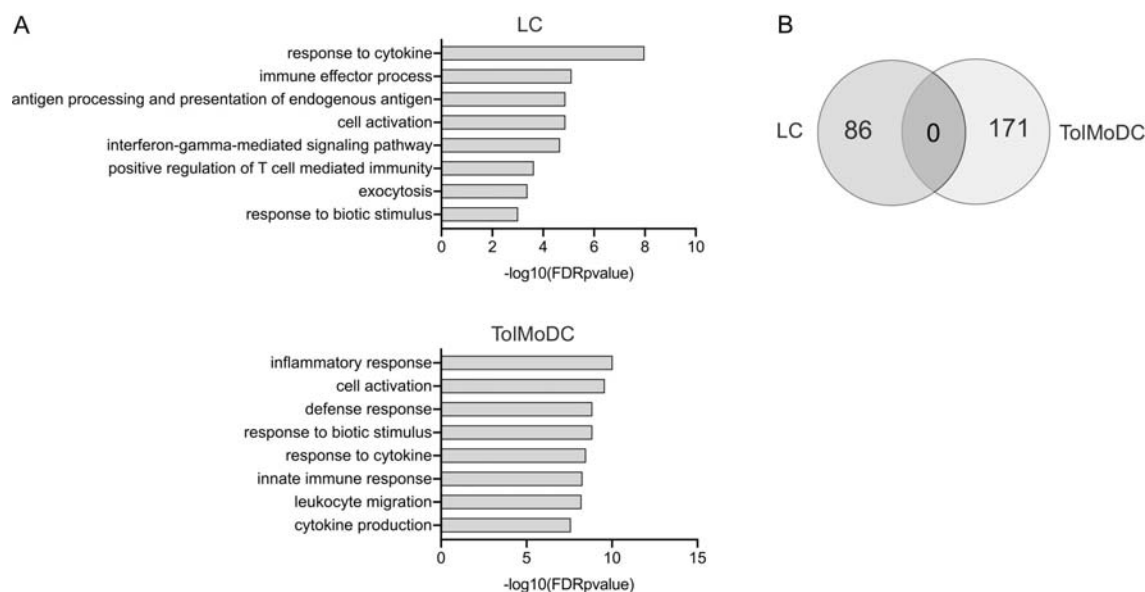

797  
798  
799  
800  
801  
802  
803  
804  
805  
806  
807  
808  
809

**Figure S1. Steady state LCs exist in a spectrum of immune activation from immaturity to immunocompetency**

- A. Biological pathways identified from gene ontology analysis (ToppGene) of 86s DEGs upregulated in trypsinised steady-state LC compared unstimulated MoDC (GSE23618) and 171 DEGs upregulated in Dexamethasone and Vitamin D3 treated MoDC (ToIMoDC) compared to unstimulated MoDC (GSE52894) identified using Limma (FDR corrected  $p$ -value $<0.05$ ,  $\log\text{FC}>1$ ).  $-\log_{10}$  FDR corrected  $p$ -values are displayed.
- B. Venn diagram displaying crossover between upregulated DEGs identified comparing in trypsinised steady-state LC to unstimulated MoDC (GSE23618), and ToIMoDC to unstimulated MoDC (GSE52894).

810

## Supplementary Figure 2

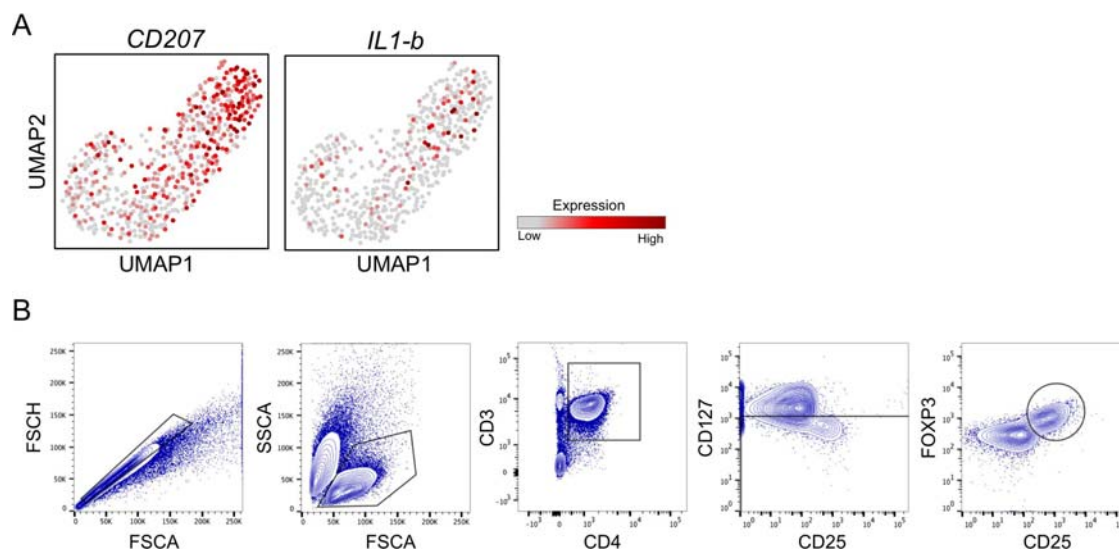

811  
812  
813  
814  
815  
816  
817  
818  
819  
820  
821

### Figure S2. Steady state immunocompetent LCs are superior at inducing FOXP3+ Tregs

- A. UMAP markers plots displaying *CD207* and *IL1B* expression amongst the steady-state LC population displaying low (grey) to high (dark red) SCnorm normalised expression.
- B. Gating strategy for investigating the quantity of CD3+CD4+CD127-CD25+FOXP3+ Tregs after co-culture of CD4 naïve T cells with LC for 5-days.

### Supplementary Figure 3

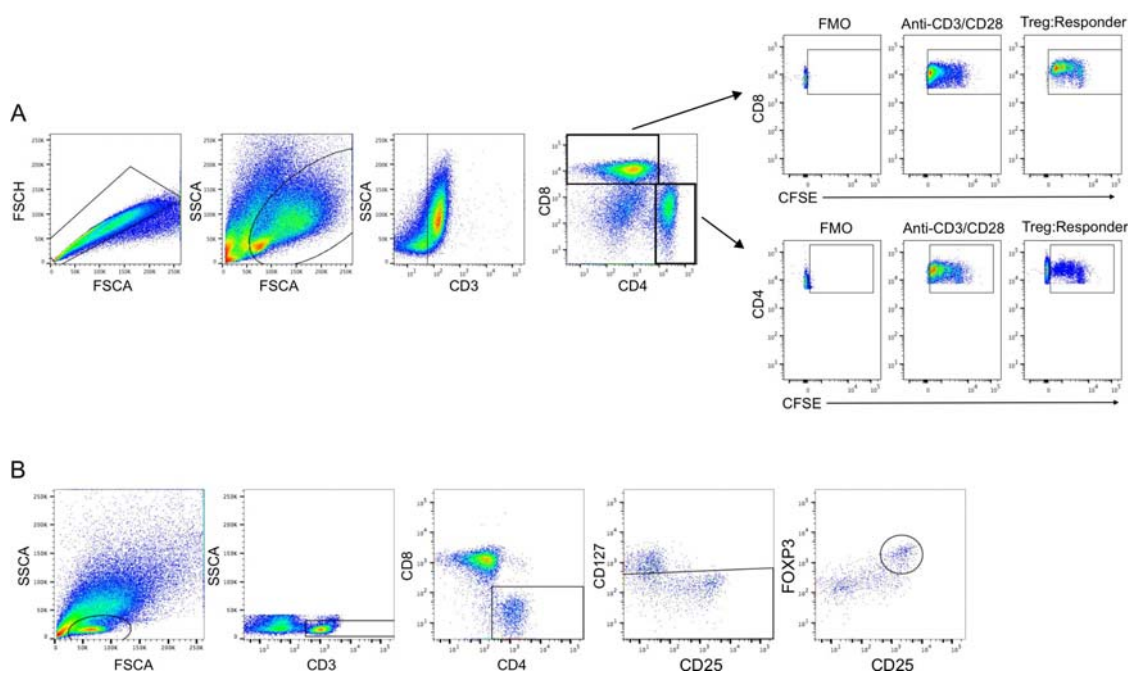

822  
823  
824  
825  
826  
827  
828  
829  
830  
831  
832  
833

#### Figure S3. Migration enhances tolerogenic abilities of immunocompetent LCs

- A. Gating strategy for investigating CFSE labelled PBMC proliferation, selecting for CD4+ and CD8+ T cell populations. CFSE measurement gating was applied to responder cell population only, excluding unlabelled CFSE negative Tregs.
- B. Gating strategy for investigating the quantity of Tregs induced after co-culture of autologous TRMs with migrated LC for 5-days.

834  
835

Supplementary Figure 4

## Supplementary Figure 4.

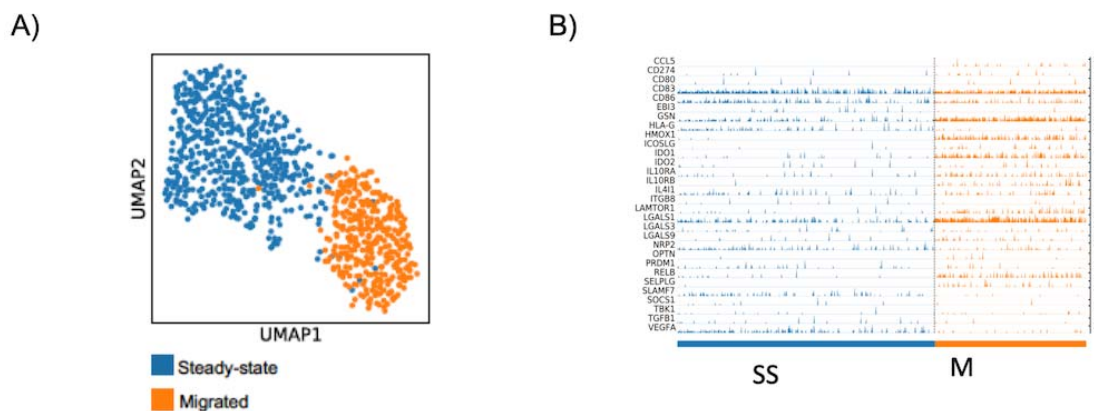

836  
837  
838  
839  
840  
841  
842  
843  
844  
845

**Figure S4. Migration from the epidermis enhances LCs tolerogenic programming.**

**A.** UMAP markers plots displaying steady state (blue) and migrated (orange) LC. SCnorm normalised expression.

**B.** Trackplot of all 30 genes from the tol 1 signature which are within the whole LC single cell transcriptomic dataset.

## Supplementary Figure 5

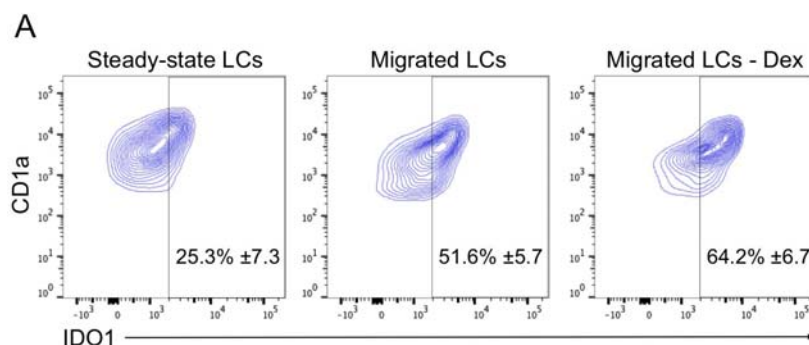

846

847

848

849

**Figure S5. LC-induced tolerance is mediated by IDO1 can be enhanced by immunotherapeutic intervention.**

850

A. Gating strategy to define the percentage of IDO1 expression in steady-state LC, migrated, and dexamethasone migrated LC. n=5 steady-state and migrated LC experiments, n=4 migrated dexamethasone experiments.

851

852

853

854

Supplementary Figure 6.

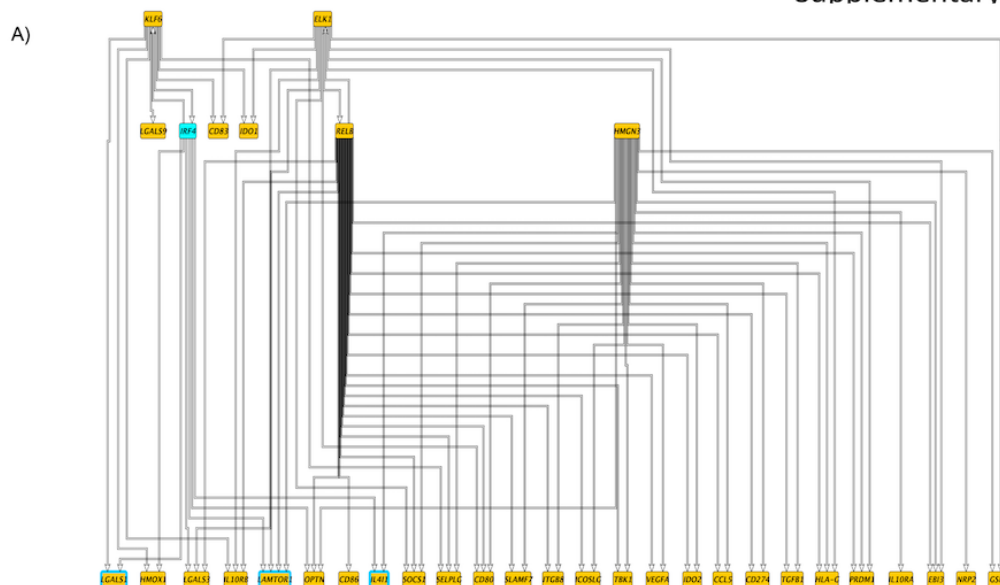

855

B) FDR<0.01, logFC>1 All TFs with regulon enrichment upregulated in migrated LC

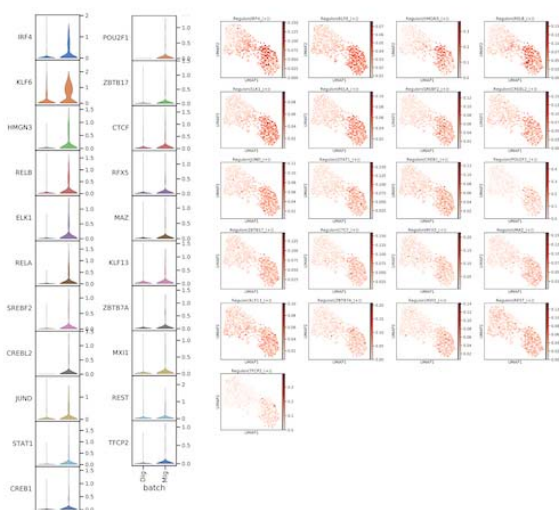

C) FDR<0.01, logFC>1 All TFs with regulon enrichment upregulated in Steady-state LC

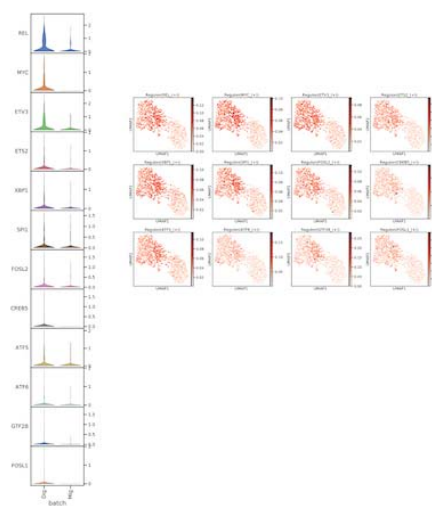

856

857

**Figure S6. LC tolerogenic function depends on induction of IRF4-regulated transcriptional module.**

858

859 **A.** PIDC network graph comprising 70 edges with weight >1, hierarchically organized,  
860 displaying predicted regulatory modules for the top 5 enriched TFs with genes within the tol  
861 1 signature.

862 **B.** Violin plots displaying the transcriptomic expression of migrated LC upregulated TFs  
863 (FDR corrected p-values<0.01, logFC>1) identified to be enriched in migrated LCs from  
864 SCENIC analysis (z-score>0.4). UMAP marker plots showing TF regulon enrichment Z-  
865 scores in each cell, across the two LC populations are displayed alongside.

866 **C.** Violin plots displaying the transcriptomic expression of steady-state LC upregulated TFs  
867 (FDR corrected p-values<0.01, logFC>1) identified to be enriched in steady-state LCs from  
868 SCENIC analysis (z-score>0.4). UMAP marker plots showing TF regulon enrichment Z-  
869 scores in each cell, across the steady-state and migrated LC populations and datasets (D1-  
870 D4) are displayed alongside.
